# Supplementary material for: Bayesian clustering and feature selection for cancer tissue samples
Source: PubMed Central journal article supplement (PMC2679022; doi:10.1186/1471-2105-10-90), 2009-03-18
Supplement: 1471-2105-10-90-S1.pdf [file 1471-2105-10-90-S1.pdf]

Table 1S. Results of validity experiments with learning from synthetic data

(a)  $k = 30$ :

| .01             |                |                |                 | .05             |                |                |                 | .10             |                |                |                 |
|-----------------|----------------|----------------|-----------------|-----------------|----------------|----------------|-----------------|-----------------|----------------|----------------|-----------------|
| $\alpha = .875$ | $\alpha = .90$ | $\alpha = .95$ | $\alpha = .975$ | $\alpha = .875$ | $\alpha = .90$ | $\alpha = .95$ | $\alpha = .975$ | $\alpha = .875$ | $\alpha = .90$ | $\alpha = .95$ | $\alpha = .975$ |
| .292            | .344           | .439           | .467            | .242            | .278           | .402           | .420            | .215            | .266           | .334           | .373            |
| 13.60           | 14.80          | 17.35          | 18.60           | 11.60           | 13.45          | 16.55          | 17.90           | 11.01           | 12.70          | 15.60          | 17.25           |
| .360            | .390           | .427           | .432            | .278            | .339           | .384           | .384            | .268            | .308           | .372           | .378            |
| .435            | .436           | .410           | .383            | .407            | .421           | .399           | .369            | .398            | .411           | .404           | .373            |
| $\alpha = .875$ | $\alpha = .90$ | $\alpha = .95$ | $\alpha = .975$ | $\alpha = .875$ | $\alpha = .90$ | $\alpha = .95$ | $\alpha = .975$ | $\alpha = .875$ | $\alpha = .90$ | $\alpha = .95$ | $\alpha = .975$ |
| .708            | .765           | .891           | .919            | .651            | .707           | .869           | .880            | .722            | .778           | .916           | .941            |
| 22.45           | 23.70          | 27.00          | 28.05           | 21.85           | 23.15          | 26.50          | 27.20           | 23.10           | 24.60          | 27.75          | 28.45           |
| .622            | .655           | .718           | .716            | .612            | .649           | .707           | .684            | .652            | .691           | .741           | .713            |
| .431            | .403           | .304           | .261            | .424            | .403           | .312           | .284            | .408            | .372           | .280           | .256            |
| $\alpha = .875$ | $\alpha = .90$ | $\alpha = .95$ | $\alpha = .975$ | $\alpha = .875$ | $\alpha = .90$ | $\alpha = .95$ | $\alpha = .975$ | $\alpha = .875$ | $\alpha = .90$ | $\alpha = .95$ | $\alpha = .975$ |
| .946            | .963           | .992           | .993            | .936            | .978           | .989           | .994            | .971            | .980           | .989           | .995            |
| 28.45           | 28.80          | 29.70          | 29.70           | 28.15           | 29.35          | 29.70          | 29.90           | 28.95           | 29.30          | 29.70          | 29.85           |
| .878            | .878           | .879           | .829            | .862            | .900           | .873           | .837            | .896            | .900           | .876           | .832            |
| .210            | .200           | .158           | .176            | .226            | .159           | .151           | .158            | .199            | .179           | .170           | .176            |

(b)  $k = 50$ :

| .01             |                |                |                 | .05             |                |                |                 | .10             |                |                |                 |
|-----------------|----------------|----------------|-----------------|-----------------|----------------|----------------|-----------------|-----------------|----------------|----------------|-----------------|
| $\alpha = .875$ | $\alpha = .90$ | $\alpha = .95$ | $\alpha = .975$ | $\alpha = .875$ | $\alpha = .90$ | $\alpha = .95$ | $\alpha = .975$ | $\alpha = .875$ | $\alpha = .90$ | $\alpha = .95$ | $\alpha = .975$ |
| .988            | .989           | .992           | .993            | .973            | .956           | .973           | .981            | .924            | .940           | .967           | .970            |
| 48.05           | 48.25          | 48.65          | 48.80           | 45.60           | 46.20          | 47.25          | 48.10           | 45.50           | 46.15          | 47.55          | 48.25           |
| .901            | .903           | .894           | .875            | .841            | .846           | .841           | .827            | .835            | .843           | .836           | .814            |
| .234            | .222           | .205           | .205            | .296            | .285           | .261           | .244            | .294            | .275           | .248           | .236            |
| $\alpha = .875$ | $\alpha = .90$ | $\alpha = .95$ | $\alpha = .975$ | $\alpha = .875$ | $\alpha = .90$ | $\alpha = .95$ | $\alpha = .975$ | $\alpha = .875$ | $\alpha = .90$ | $\alpha = .95$ | $\alpha = .975$ |
| .999            | .999           | .999           | .998            | .999            | .999           | .999           | .999            | .999            | .999           | .999           | .999            |
| 50.00           | 50.00          | 50.10          | 50.15           | 50.00           | 50.00          | 50.00          | 50.10           | 50.00           | 50.00          | 50.00          | 50.00           |
| .978            | .976           | .956           | .936            | .988            | .984           | .966           | .950            | .989            | .986           | .974           | .959            |
| .058            | .059           | .084           | .101            | .041            | .050           | .077           | .091            | .036            | .042           | .064           | .081            |
| $\alpha = .875$ | $\alpha = .90$ | $\alpha = .95$ | $\alpha = .975$ | $\alpha = .875$ | $\alpha = .90$ | $\alpha = .95$ | $\alpha = .975$ | $\alpha = .875$ | $\alpha = .90$ | $\alpha = .95$ | $\alpha = .975$ |
| 1.000           | 1.000          | 1.000          | 1.000           | .999            | 1.000          | 1.000          | .999            | .999            | .999           | .999           | .999            |
| 50.00           | 50.00          | 50.00          | 50.00           | 50.00           | 50.00          | 50.00          | 50.00           | 50.00           | 50.00          | 50.00          | 50.15           |
| .999            | .997           | .993           | .986            | .998            | .997           | .992           | .986            | .995            | .993           | .986           | .974            |
| .006            | .014           | .029           | .044            | .009            | .017           | .031           | .045            | .022            | .030           | .048           | .063            |

The values .01, .05, .1 refer to the defined levels of noise in the generating model. The three rows of each table panel (a,b) correspond to the generating distributions of the cluster sizes: Uniform(5,20), Uniform(10,25), Uniform(15,30), in the given order (top-down). Each column of

four values under a specific value of  $\alpha$  reports means over 20 simulated data sets generated using the same design ( $k$ , distribution of the number of clusters, noise level) and analyzed using the proposed method. The four reported values are (top-down): adjusted Rand Index, number of clusters in the optimal partition, mean percentage (over clusters) of the group-specific amplifications correctly discovered by the optimal model structure, std.dev. of the percentage (over clusters) of the group-specific amplifications correctly discovered by the optimal model structure.
